# Supplementary material for: Therapeutic effects of the novel subtype-selective histone deacetylase inhibitor chidamide on myeloma-associated bone disease
Source: PubMed Central journal article supplement — Haematologica. 2018 May 17;103(8):1369–79. doi: 10.3324/haematol.2017.181172 (PMC6068041; doi:10.3324/haematol.2017.181172), 2018-08
Supplement: 2017_181172-Disclosures_and_Contributions.pdf [file 2017_181172-Disclosures_and_Contributions.pdf]

Haematologica  
HAEMATOL/2017/181172  
Version 4

Therapeutic effects of the novel subtype-selective histone deacetylase (HDAC) inhibitor chidamide on myeloma-associated bone disease

Jingsong He, Qingxiao Chen, Huiyao Gu, Jing Chen, Enfan Zhang, Xing Guo, Xi Huang, Haimeng Yan, DongHua He, Yang Yang, Yi Zhao, Gang Wang, Huang He, Qing Yi, and Zhen Cai

Disclosures: none

Contributions: J.H. and Z.C. initiated the study, designed the experiment, Q.C. and H.G. performed the majority of the experiments, Q.C wrote the manuscript. J.C., X.G., E.Z., X.H. and H.Y. performed the research, analyzed the data. Y.Z., Y. Y. and D.H. collected primary samples for the study. J. H, Q.Y., Z. C. supervised experiments. J.H and Q.C contributed equally to the study.
